# Supplementary material for: Highly efficient solar-driven photocatalytic hydrogen evolution by a ternary 3D ZnIn2S4–MoS2 microsphere/1D TiO2 nanobelt heterostructure
Source: Royal Society of Chemistry journal article supplement (doi:10.1039/d1nj00608h), 2021-01-01
Supplement: d1nj00608h1.pdf [file d1nj00608h1.pdf]

## Supporting information

### Highly Efficient Solar-driven Photocatalytic Hydrogen Evolution by Ternary 3D ZnIn<sub>2</sub>S<sub>4</sub>-MoS<sub>2</sub> Microsphere/1D TiO<sub>2</sub> Nanobelt Heterostructure

Hanghang Zhou,<sup>a</sup> Lan Wang,<sup>\*a</sup> Hang Shi,<sup>a</sup> Huan Zhang,<sup>a</sup> Yue Wang,<sup>a</sup> Shiqi Bai,<sup>a</sup> Yifan Yang,<sup>a</sup> Yujuan Li,<sup>a</sup> Tingting Zhang<sup>a</sup> and Hongzhong Zhang<sup>\*a</sup>

<sup>a</sup>Henan Collaborative Innovation Center of Environmental Pollution Control and Ecological Restoration, School of Material and Chemical Engineering, Zhengzhou University of Light Industry, Zhengzhou 450001, China

Tel: 86-10-63556510; E-mail: [lwang2017@zzuli.edu.cn](mailto:lwang2017@zzuli.edu.cn) and [zhz@zzuli.edu.cn](mailto:zhz@zzuli.edu.cn)

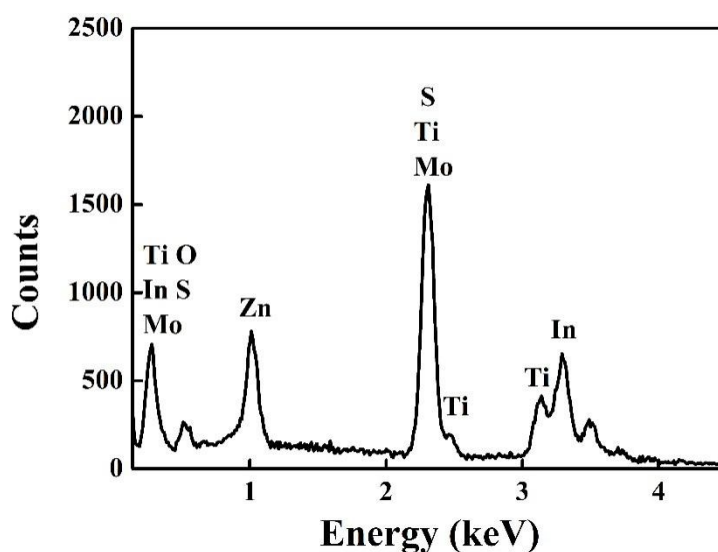

Figure S1 EDS spectrum of 250%-ZIS/25%-MoS<sub>2</sub>/TiO<sub>2</sub> composite

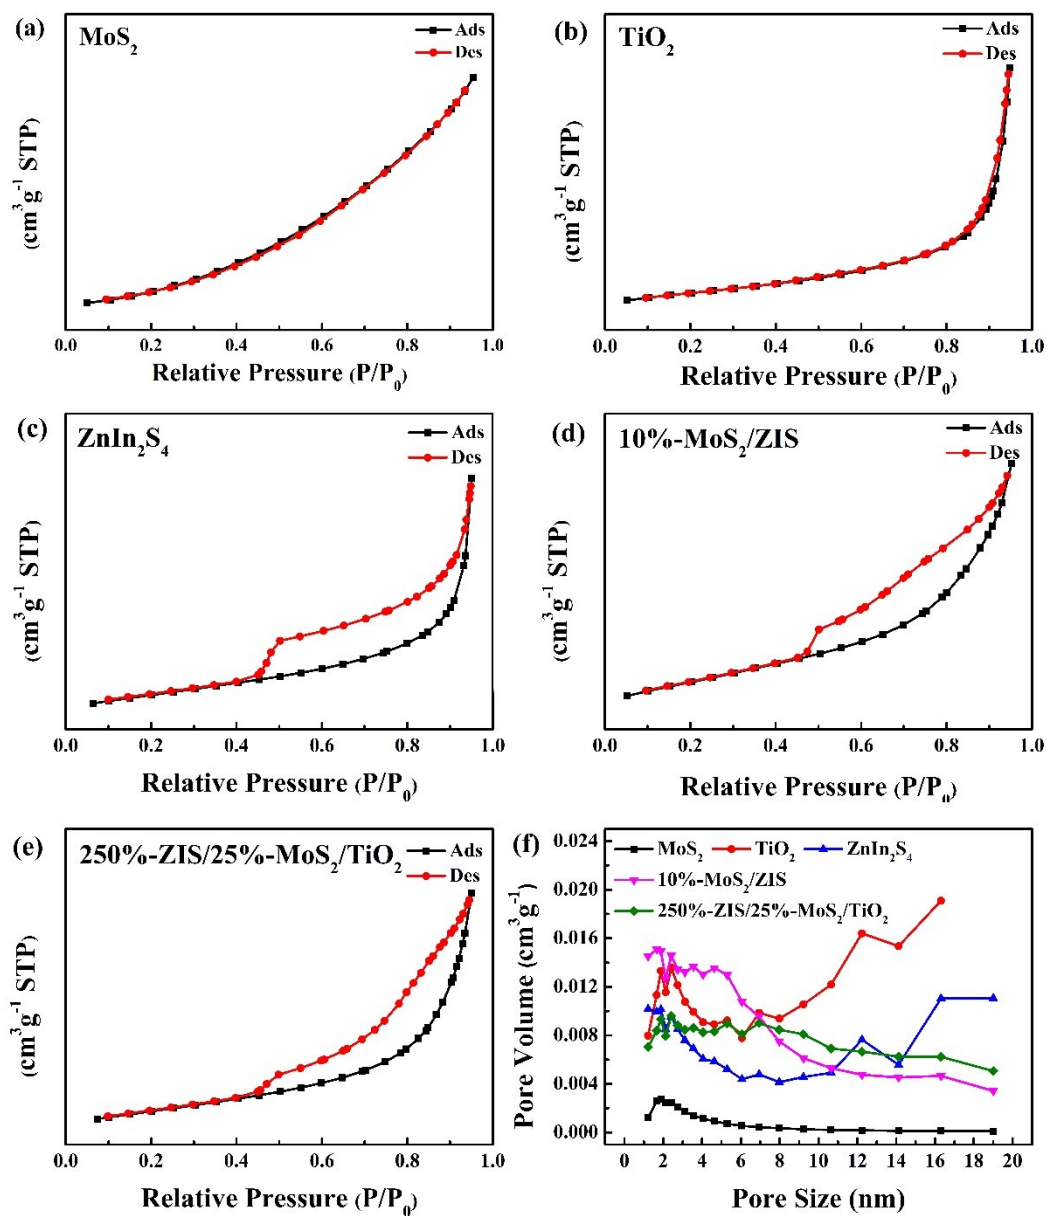

**Figure S2** (a-e) Nitrogen adsorption-desorption isotherms and (f) corresponding the Barrett-Joyner-Halenda (BJH) pore size distribution curves of MoS<sub>2</sub>, TiO<sub>2</sub>, ZnIn<sub>2</sub>S<sub>4</sub>, 10%-MoS<sub>2</sub>/ZIS and 250%-ZIS/25%-MoS<sub>2</sub>/TiO<sub>2</sub> samples

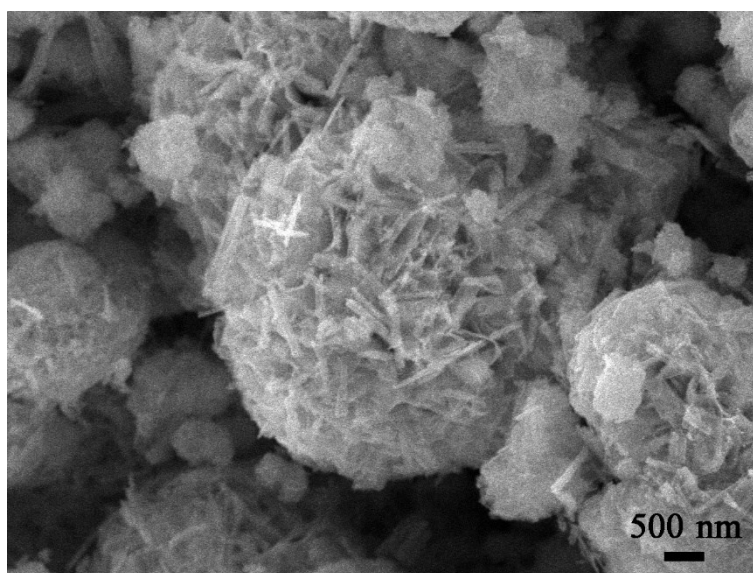

**Figure S3** SEM images of 250%-ZIS/25%-MoS<sub>2</sub>/TiO<sub>2</sub> after four cycles

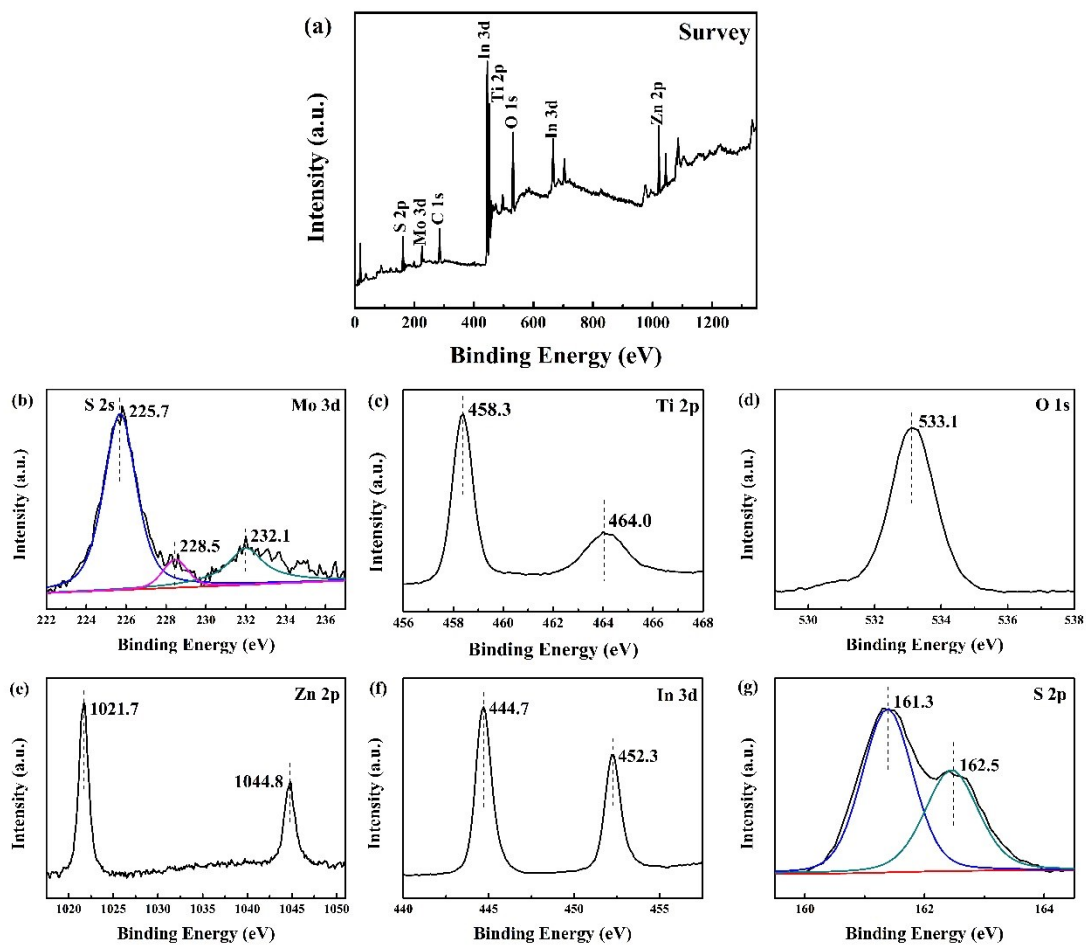

Figure S4 XPS of 250%-ZIS/25%-MoS<sub>2</sub>/TiO<sub>2</sub> after four cycles

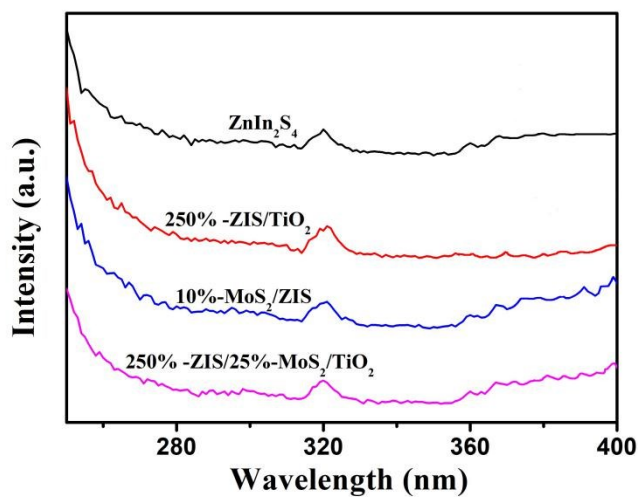

Figure S5 Excitation spectrum of ZnIn<sub>2</sub>S<sub>4</sub>, 250%-ZIS/TiO<sub>2</sub>, 10%-MoS<sub>2</sub>/ZIS and 250%-

ZIS/25%-MoS<sub>2</sub>/TiO<sub>2</sub>

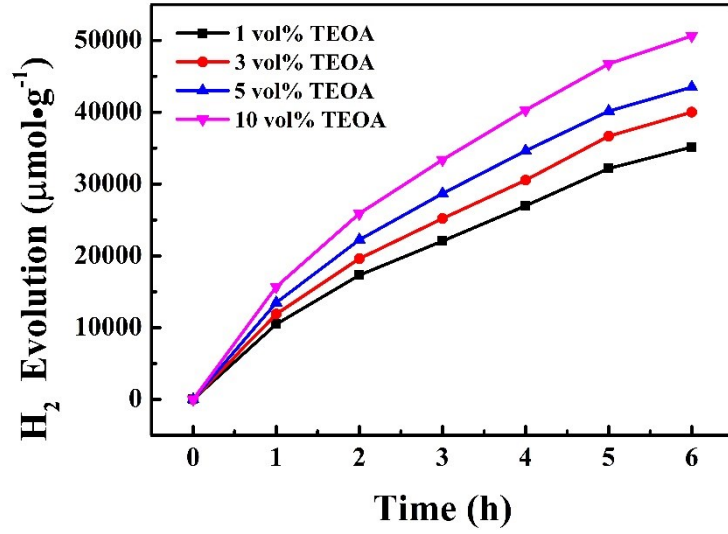

Figure S6 Time courses of H<sub>2</sub> evolution with different TEOA contents

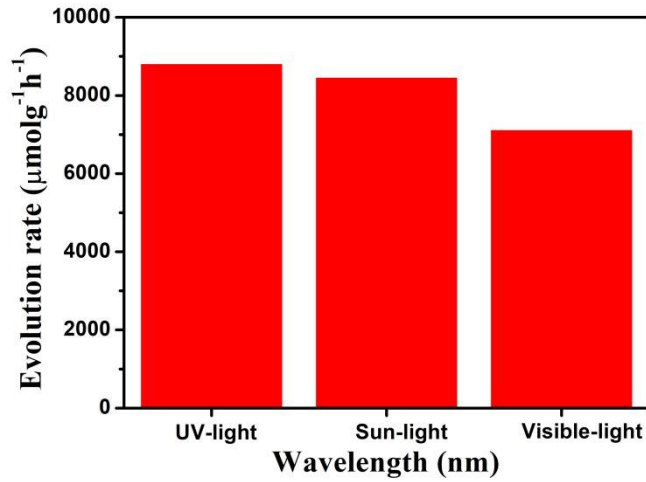

Figure S7 The rate of H<sub>2</sub> evolution of the 250%-ZIS/25%-MoS<sub>2</sub>/TiO<sub>2</sub> under UV-light ( $\lambda=380$  nm), sunlight (AM 1.5) and visible light ( $\lambda=380$  nm).

**Table S1** The atomic ratios (Zn:In:Mo:Ti) of as-synthesized 250%-ZIS/25%-  
MoS<sub>2</sub>/TiO<sub>2</sub> measured by ICP-AES.

| Sample                  | Element           |
|-------------------------|-------------------|
| Precursor (Zn:In:Mo:Ti) | Zn:In:Mo:Ti (ICP) |
| 3.8:7.6:1:8             | 3:5.8:1:7.5       |

**Table S2.** BET specific surface area, pore size, pore volume of the synthesized composite.

| Samples                                         | $S_{BET}$<br>(m <sup>2</sup> /g) | Pore Size<br>(nm) | Pore volume<br>(cm <sup>3</sup> /g) |
|-------------------------------------------------|----------------------------------|-------------------|-------------------------------------|
| MoS <sub>2</sub>                                | 3.166                            | 10.754            | 0.008                               |
| TiO <sub>2</sub>                                | 43.711                           | 19.187            | 0.242                               |
| ZnIn <sub>2</sub> S <sub>4</sub>                | 34.924                           | 8.599             | 0.075                               |
| 10%-MoS <sub>2</sub> /ZIS                       | 59.587                           | 10.046            | 0.149                               |
| 250%-ZIS/25%-MoS <sub>2</sub> /TiO <sub>2</sub> | 50.372                           | 12.683            | 0.142                               |

**Table S3.** The apparent quantum efficiency (AQE) of MoS<sub>2</sub>, TiO<sub>2</sub>, ZnIn<sub>2</sub>S<sub>4</sub>, 250%-ZIS/TiO<sub>2</sub>, 25%-MoS<sub>2</sub>/TiO<sub>2</sub>, 10%-MoS<sub>2</sub>/ZIS and 250%-ZIS/25%-MoS<sub>2</sub>/TiO<sub>2</sub>. The apparent quantum efficiency (AQE) was analyzed with a wavelength of 380 nm under the 300 W Xe lamp (PLS-SXE300) irradiation. The other experimental conditions were similar to the photocatalytic hydrogen evolution measurement as described before. The light intensity was obtained with an optical power meter (PL-MW2000, Beijing Perfectlight Co. Ltd., China). For example, if 380 nm is used, the average light intensity is 19.1 mW cm<sup>-2</sup>. The irradiation area is 19.625 cm<sup>2</sup> (2.5 cm radius). The number of incident photons ( $N$ ) is  $1.55 \times 10^{22}$  calculated by equation (1). The amount of H<sub>2</sub> molecules generated for 6 h were about 5064.2 μmol. The AQE was then calculated in equation (2).

$$N = \frac{E\lambda}{hc} = \frac{19.1 \times 19.625 \times 10^{-3} \times 6 \times 3600 \times 380 \times 10^{-9}}{6.626 \times 10^{-34} \times 3 \times 10^8} = 1.55 \times 10^{22} \quad (1)$$

$$\begin{aligned} AQE &= \frac{\text{the number of reacted electrons}}{\text{the number of incident photons}} \times 100\% \\ &= \frac{2 \times \text{the number of evolved H}_2 \text{ molecules}}{N} \times 100\% \\ &= \frac{2 \times 6.02 \times 10^{23} \times 5064.2 \times 10^{-6}}{1.55 \times 10^{22}} \times 100\% = 39.33\% \end{aligned} \quad (2)$$

For example, if 420 nm is used, the average light intensity is 19.1 mW cm<sup>-2</sup>. The irradiation area is 19.625 cm<sup>2</sup> (2.5 cm radius). The number of incident photons ( $N$ ) is  $1.71 \times 10^{22}$  calculated by equation (1). The amount of H<sub>2</sub> molecules generated for 6 h



were about 4262.8  $\mu\text{mol}$ . The AQE was then calculated in equation (2).

$$N = \frac{E\lambda}{hc} = \frac{19.1 \times 19.625 \times 10^{-3} \times 6 \times 3600 \times 420 \times 10^{-9}}{6.626 \times 10^{-34} \times 3 \times 10^8} = 1.71 \times 10^{22} \quad (1)$$

$$\begin{aligned} AQE &= \frac{\text{the number of reacted electrons}}{\text{the number of incident photons}} \times 100\% \\ &= \frac{2 \times \text{the number of evolved } H_2 \text{ molecules}}{N} \times 100\% \\ &= \frac{2 \times 6.02 \times 10^{23} \times 4262.8 \times 10^{-6}}{1.71 \times 10^{22}} \times 100\% = 30.0\% \end{aligned} \quad (2)$$

| Samples                                                  | AQE (%) |
|----------------------------------------------------------|---------|
| MoS <sub>2</sub>                                         | 0.00    |
| TiO <sub>2</sub>                                         | 0.02    |
| ZnIn <sub>2</sub> S <sub>4</sub>                         | 0.93    |
| 250%-ZIS/TiO <sub>2</sub>                                | 1.27    |
| 25%-MoS <sub>2</sub> /TiO <sub>2</sub>                   | 0.11    |
| 10%-MoS <sub>2</sub> /ZIS                                | 19.99   |
| 250%-ZIS/25%-MoS <sub>2</sub> /TiO <sub>2</sub>          | 39.33   |
| 250%-ZIS/25%-MoS <sub>2</sub> /TiO <sub>2</sub> (420 nm) | 30.0    |

**Table S4.** AQE over some ZnIn<sub>2</sub>S<sub>4</sub>-based photocatalysts in reported work in contrast with this work.

| Sample                                          | Light source        | Sacrificial agents | AQE    | Reference     |
|-------------------------------------------------|---------------------|--------------------|--------|---------------|
| 250%-ZIS/25%-MoS <sub>2</sub> /TiO <sub>2</sub> | simulated sun-light | 10 vol% TEOA       | 39.33% | In this paper |

|                                                                   |                            |                                                                     |        |    |
|-------------------------------------------------------------------|----------------------------|---------------------------------------------------------------------|--------|----|
|                                                                   | $\lambda > 420 \text{ nm}$ | 10 vol% TEOA                                                        | 30%    |    |
| 3wt% MoS <sub>2</sub> /CQDs/ZnIn <sub>2</sub> S <sub>4</sub>      | $\lambda > 420 \text{ nm}$ | 0.1 M<br>Na <sub>2</sub> S/Na <sub>2</sub> SO <sub>3</sub>          | 25.6%  | 1  |
| 6wt% MoS <sub>2</sub> /Cu-ZnIn <sub>2</sub> S <sub>4</sub>        | $\lambda > 420 \text{ nm}$ | 0.1M<br>ascorbic acid                                               | 13.6%  | 2  |
| 1wt% MoS <sub>2</sub> /ZnIn <sub>2</sub> S <sub>4</sub>           | $\lambda > 420 \text{ nm}$ | 10vol% lactic<br>acid                                               | 3.08%  | 3  |
| RGO/ZnIn <sub>2</sub> S <sub>4</sub>                              | $\lambda > 420 \text{ nm}$ | 10vol% TEOA                                                         | 4.4%   | 4  |
| ZnIn <sub>2</sub> S <sub>4</sub> /g-C <sub>3</sub> N <sub>4</sub> | $\lambda > 420 \text{ nm}$ | 20vol% TEOA                                                         | 7.05%  | 5  |
| ZnIn <sub>2</sub> S <sub>4</sub> /pCN                             | $\lambda > 400 \text{ nm}$ | 20vol% TEOA                                                         | 0.92%  | 6  |
| ZnIn <sub>2</sub> S <sub>4</sub> @NH <sub>2</sub> -MIL-125(Ti)    | $\lambda > 420 \text{ nm}$ | 0.25 M Na <sub>2</sub> SO <sub>3</sub><br>&0.35 M Na <sub>2</sub> S | 4.3%   | 7  |
| Ni <sub>2</sub> P/ZnIn <sub>2</sub> S <sub>4</sub>                | $\lambda > 400 \text{ nm}$ | 10vol% lactic<br>acid                                               | 7.7%   | 8  |
| CuInS <sub>2</sub> /ZnIn <sub>2</sub> S <sub>4</sub>              | $\lambda > 420 \text{ nm}$ | Na <sub>2</sub> S&Na <sub>2</sub> SO <sub>3</sub>                   | 12.4%  | 9  |
| ZnIn <sub>2</sub> S <sub>4</sub> /Ni <sub>12</sub> P <sub>5</sub> | $\lambda > 420 \text{ nm}$ | 0.25 M Na <sub>2</sub> SO <sub>3</sub><br>&0.35 M Na <sub>2</sub> S | 20.5%  | 10 |
| ZnIn <sub>2</sub> S <sub>4</sub> /MoSe <sub>2</sub>               | $\lambda > 420 \text{ nm}$ | 0.25 M Na <sub>2</sub> SO <sub>3</sub><br>&0.35 M Na <sub>2</sub> S | 21.39% | 11 |

**Table S5.** Photocatalytic hydrogen evolution over the reported ZnIn<sub>2</sub>S<sub>4</sub>/X composite

| Sample                                                                     | Hydrogen production rate ( $\mu$ mol g <sup>-1</sup> h <sup>-1</sup> ) | The hydrogen production rate ratio (ZnIn <sub>2</sub> S <sub>4</sub> /X vs ZnIn <sub>2</sub> S <sub>4</sub> ) | Condition: sacrificial agents, cocatalyst light                   | Reference     |
|----------------------------------------------------------------------------|------------------------------------------------------------------------|---------------------------------------------------------------------------------------------------------------|-------------------------------------------------------------------|---------------|
| 250%-ZIS/25%-MoS <sub>2</sub> /TiO <sub>2</sub>                            | 8440.28                                                                | 44.4                                                                                                          | 10vol% TEOA                                                       | In this paper |
| ZnIn <sub>2</sub> S <sub>4</sub>                                           | 190.1                                                                  |                                                                                                               | simulated sun-light                                               |               |
| 3wt% MoS <sub>2</sub> /CQDs/ZnIn <sub>2</sub> S <sub>4</sub>               | 3000                                                                   | 17.8                                                                                                          | 0.1 M Na <sub>2</sub> S/Na <sub>2</sub> SO <sub>3</sub>           | 1             |
| ZnIn <sub>2</sub> S <sub>4</sub>                                           | 168                                                                    |                                                                                                               | $\lambda > 420$ nm                                                |               |
| 1wt%MoS <sub>2</sub> /ZnIn <sub>2</sub> S <sub>4</sub>                     | 2512.5                                                                 | 8.7                                                                                                           | 8% lactic acid                                                    | 3             |
| ZnIn <sub>2</sub> S <sub>4</sub>                                           | 287.5                                                                  |                                                                                                               | $\lambda > 420$ nm                                                |               |
| MoS <sub>2</sub> -QDs/ZnIn <sub>2</sub> S <sub>4</sub>                     | 7156                                                                   | 9                                                                                                             | TEOA                                                              | 12            |
| ZnIn <sub>2</sub> S <sub>4</sub>                                           | 794.7                                                                  |                                                                                                               | $\lambda > 420$ nm                                                |               |
| ZnIn <sub>2</sub> S <sub>4</sub> /MoS <sub>2</sub> -RGO                    | 425.1                                                                  | 34.6                                                                                                          | 20vol% lactic acid                                                | 13            |
| ZnIn <sub>2</sub> S <sub>4</sub>                                           | 12.3                                                                   |                                                                                                               | $\lambda > 420$ nm                                                |               |
| 2wt% 1T-Li <sub>x</sub> MoS <sub>2</sub> /ZnIn <sub>2</sub> S <sub>4</sub> | 6648                                                                   | 2.4                                                                                                           | 0.25 M Na <sub>2</sub> SO <sub>3</sub> & 0.35 M Na <sub>2</sub> S | 14            |
| ZnIn <sub>2</sub> S <sub>4</sub>                                           | 2270                                                                   |                                                                                                               | $\lambda > 420$ nm                                                |               |

|                                                                   |        |      |                                        |    |
|-------------------------------------------------------------------|--------|------|----------------------------------------|----|
| MoS <sub>2</sub> /ZnIn <sub>2</sub> S <sub>4</sub>                | 8898   | 16   | 10vol% TEOA                            | 15 |
| ZnIn <sub>2</sub> S <sub>4</sub>                                  | 556    |      | $\lambda > 400$ nm                     |    |
| CdS/QDs/ZnIn <sub>2</sub> S <sub>4</sub>                          | 2107.5 | 62   | 20vol% lactic acid                     | 16 |
| ZnIn <sub>2</sub> S <sub>4</sub>                                  | 33.9   |      | $\lambda > 420$ nm                     |    |
| 5%-MoS <sub>2</sub> /ZnIn <sub>2</sub> S <sub>4</sub>             | 3891.6 | 381  | 0.25 M Na <sub>2</sub> SO <sub>3</sub> | 17 |
| ZnIn <sub>2</sub> S <sub>4</sub>                                  | 10.2   |      | &0.35 M Na <sub>2</sub> S              |    |
|                                                                   |        |      | $\lambda > 420$ nm                     |    |
| RGO/ZnIn <sub>2</sub> S <sub>4</sub>                              | 2640.8 | 4.2  | 10vol% TEOA                            | 4  |
| ZnIn <sub>2</sub> S <sub>4</sub>                                  | 625.6  |      | 0.3 wt% Pt                             |    |
|                                                                   |        |      | $\lambda > 420$ nm                     |    |
| ZnIn <sub>2</sub> S <sub>4</sub> /g-C <sub>3</sub> N <sub>4</sub> | 2780   | 15.4 | 20vol% TEOA                            | 5  |
| ZnIn <sub>2</sub> S <sub>4</sub>                                  | 180.6  |      | $\lambda > 420$ nm                     |    |
| ZnIn <sub>2</sub> S <sub>4</sub> /pCN                             | 8601   | 2.3  | 20vol% TEOA                            | 6  |
| ZnIn <sub>2</sub> S <sub>4</sub>                                  | 3739   |      | $\lambda > 400$ nm                     |    |
| ZnIn <sub>2</sub> S <sub>4</sub> @NH <sub>2</sub> -MIL-125(Ti)    | 2204.2 | 6.5  | 0.25 M Na <sub>2</sub> SO <sub>3</sub> | 7  |
| ZnIn <sub>2</sub> S <sub>4</sub>                                  | 339    |      | &0.35 M Na <sub>2</sub> S              |    |
|                                                                   |        |      | $\lambda > 420$ nm                     |    |
| ZnIn <sub>2</sub> S <sub>4</sub> /Ni <sub>12</sub> P <sub>5</sub> | 2263   | 2    | 0.25 M Na <sub>2</sub> SO <sub>3</sub> | 10 |
|                                                                   |        |      | &0.35 M Na <sub>2</sub> S              |    |
| ZnIn <sub>2</sub> S <sub>4</sub>                                  | 1115   |      | $\lambda > 420$ nm                     |    |

|                                                                    |       |     |                                                                      |    |
|--------------------------------------------------------------------|-------|-----|----------------------------------------------------------------------|----|
| ZnIn <sub>2</sub> S <sub>4</sub> /MoSe <sub>2</sub>                | 2228  | 2.2 | 0.25 M Na <sub>2</sub> SO <sub>3</sub><br>&0.35 M Na <sub>2</sub> S  | 11 |
| ZnIn <sub>2</sub> S <sub>4</sub>                                   | 1023  |     | $\lambda > 420$ nm                                                   |    |
| NiS/ZnIn <sub>2</sub> S <sub>4</sub>                               | 3333  | 2.9 | 50vol% lactic acid                                                   | 18 |
| ZnIn <sub>2</sub> S <sub>4</sub>                                   | 1133  |     | $\lambda > 420$ nm                                                   |    |
| AgIn <sub>5</sub> S <sub>8</sub> /ZnIn <sub>2</sub> S <sub>4</sub> | 949.9 | 3.6 | 0.25 M Na <sub>2</sub> S &<br>0.25 M Na <sub>2</sub> SO <sub>3</sub> | 19 |
| ZnIn <sub>2</sub> S <sub>4</sub>                                   | 263.8 |     | 2 wt% Pt<br>$\lambda > 420$ nm                                       |    |
| 3%WS <sub>2</sub> /ZnIn <sub>2</sub> S <sub>4</sub>                | 199.1 | 6   | 0.25 M Na <sub>2</sub> SO <sub>3</sub> &<br>0.35 M Na <sub>2</sub> S | 20 |
| ZnIn <sub>2</sub> S <sub>4</sub>                                   | 33.2  |     | $\lambda \geq 420$ nm                                                |    |

## REFERENCE

- 1 B. Wang, Z. Deng, X. Fu and Z. Li, *J. Mater. Chem. A*, 2018, **6**, 19735-19742.
- 2 Y. J. Yuan, D. Chen, J. Zhong, L. X. Yang, J. Wang, M. J. Liu, W. G. Tu, Z. T. Yu and Z. G. Zou, *J. Mater. Chem. A*, 2017, **5**, 15771-15779.
- 3 C. Liu, B. Chai, C. Wang, J. Yan and Z. Ren, *Internat. J. Hydrogen Energ.*, 2018, **43**, 6977-6986.
- 4 Y. Xia, Q. Li, K. Lv, D. Tang and M. Li, *Appl. Catal., B*, 2017, **206**, 344-352.
- 5 B. Lin, H. Li, H. An, W. Hao, J. Wei, Y. Dai, C. Ma and G. Yang, *Appl. Catal., B*, 2018, **220**,

542-552.

- 6 H. Yang, R. Cao, P. Sun, J. Yin, S. Zhang and X. Xu, *Appl. Catal., B*, 2019, **256**, 117862.
- 7 H. Liu, J. Zhang and D. Ao, *Appl. Catal., B*, 2018, **221**, 433-442.
- 8 X. l. Li, X. j. Wang, J. y. Zhu, Y. p. Li, J. Zhao and F. t. Li, *Chem. Eng.g J.*, 2018, **353**, 15-24.
- 9 Z. Guan, J. Pan, Q. Li, G. Li and J. Yang, *ACS Sustain. Chem. Eng.*, 2019, **7**, 7736-7742.
- 10 D. Zeng, Z. Lu, X. Gao, B. Wu and W. J. Ong, *Catal. Sci. Technol.*, 2019, **9**, 4010-4016.
- 11 D. Zeng, L. Xiao, W.-J. Ong, P. Wu, H. Zheng, Y. Chen and D. L. Peng, *ChemSusChem*, 2017, **10**, 4624-4631.
- 12 Y. Liu, C. F. Li, X. Y. Li, W. B. Yu, W. D. Dong, H. Zhao, Z. Y. Hu, Z. Deng, C. Wang, S. J. Wu, H. Chen, J. Liu, Z. Wang, L. H. Chen, Y. Li and B. L. Su, *J.Colloid Interf. Sci.*, 2019, **551**, 111-118.
- 13 Z. Guan, P. Wang, Q. Li, G. Li and J. Yang, *Dalton T.*, 2018, **47**, 6800-6807.
- 14 J. Liu, W. Fang, Z. Wei, Z. Qin, Z. Jiang and W. Shangguan, *Catal. Sci. Technol.*, 2018, **8**, 1375-1382.
- 15 W. Li, Z. Lin and G. Yang, *Nanoscale*, 2017, **9**, 18290-18298.
- 16 W. Chen, R. Q. Yan, J. Q. Zhu, G. B. Huang and Z. Chen, *Appl. Surf. Sci.*, 2020, **504**, 144406.
- 17 Z. Zhang, L. Huang, J. Zhang, F. Wang, Y. Xie, X. Shang, Y. Gu, H. Zhao and X. Wang, *Appl. Catal., B*, 2018, **233**, 112-119.
- 18 A. Yan, X. Shi, F. Huang, M. Fujitsuka and T. Majima, *Appl. Catal., B*, 2019, **250**, 163-170.
- 19 Z. Guan, Z. Xu, Q. Li, P. Wang, G. Li and J. Yang, *Appl. Catal., B*, 2018, **227**, 512-518.
- 20 J. Zhou, D. Chen, L. Bai, L. Qin, X. Sun and Y. Huang, *Internat. J. Hydrogen Energ.*, 2018, **43**, 18261-18269.
